# Supplementary material for: Fractal analysis in cardiovascular magnetic resonance: prognostic value of biventricular trabecular complexity in hypertrophic cardiomyopathy
Source: PubMed Central journal article supplement — Cardiovasc Diagn Ther. 2023 Oct 26;13(6):1030–42. doi: 10.21037/cdt-23-162 (PMC10753232; doi:10.21037/cdt-23-162), 2023-10-26
Supplement: cdt-13-06-1030-supplementary.pdf [file cdt-13-06-1030-supplementary.pdf]

## Appendix 1

### *CMR scan protocols*

The parameters in Renji Hospital: (I) b-SSFP cine sequences: repetition time (TR) =2.8 ms, echo time (TE) =1.4 ms, slice thickness =7 mm, acquired matrix =1.2 mm × 1.2 mm, phases per cardiac cycle =30, field of view (FOV) =300 mm × 300 mm. (II) PSIR sequence: TR =6.1 ms, TE =3 ms, slice thickness =10 mm, FOV =300 mm × 300 mm, acquired matrix =1.6 mm × 1.9 mm.

The parameters in Anzhen Hospital: (I) b-SSFP cine sequences: TR: 43.5 ms, TE: 1.45 ms, slice thickness =8 mm. FOV: 300 mm × 300 mm. acquired matrix =1.25 mm × 1.25 mm. (II) LGE images TR: 900 ms; TE: 3.5 ms. slice thickness =8 mm. FOV: 300×300 mm. acquired matrix =0.98 mm × 0.98 mm.

In both centers, steady-state free-precession cine images were obtained during repeated breath-holds in three long axes (2-chamber, 3-chamber, and 4-chamber view) and in a stack of short axes covering the ventricles. A commercially available gadolinium-based contrast agent (gadopentetate dimeglumine, Magnevist, Bayer Healthcare) was administered intravenously at a dose of 0.1 mmol/kg body weight, and contrast-enhanced images were acquired after a 10-minute delay with the use of an inversion-recovery segmented gradient echo sequence.

### *Reproducibility*

Inter-observer variability was determined by analysis of a randomly generated set of 30 scans by two investigators. Assessment of CMR cine images by each investigator was performed independently of the other, while intra-observer variability was assessed by repetition of the analysis after a fixed time frame (1 month).

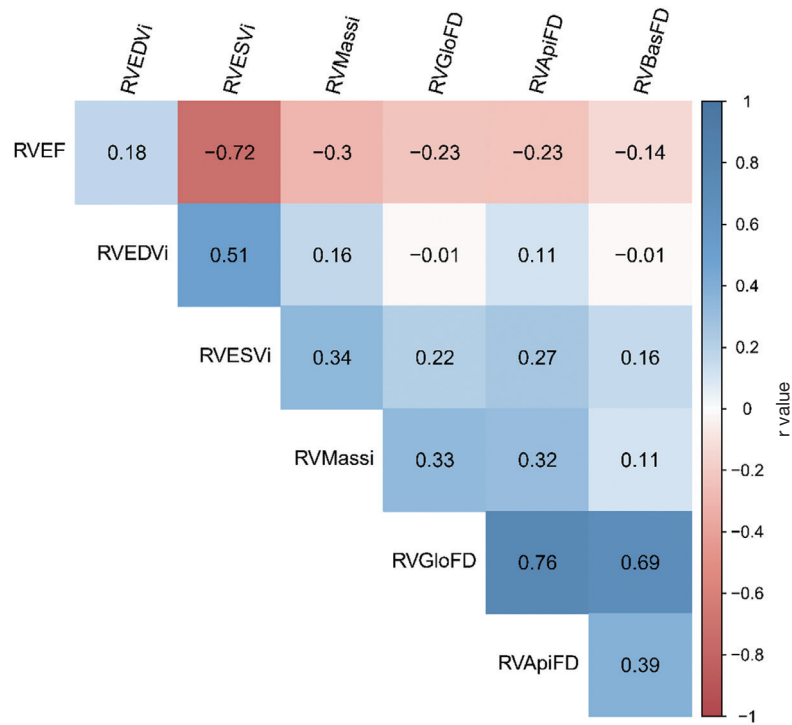

**Figure S1** Pearson correlation coefficients (r value) between RV FDs and RV function parameters.  $r < 0$  indicates negative correlation,  $r > 0$  indicates positive correlation. r value closer to 1 or -1 represents stronger correlation, while r value closer to 0 means weaker correlation. FD, fractal dimension; RV, right ventricle; Bas, max basal; Glo, global; Api, max apical; RVEF, right ventricle ejection fraction; RVEFVi, right ventricle end-diastolic volume index; RVESVi, right ventricle end-systolic volume index; RVMassI, right ventricle mass index.

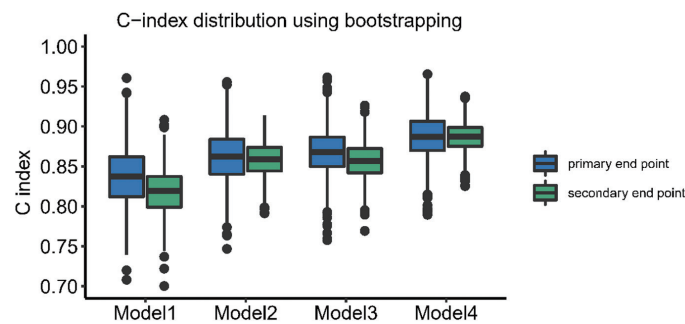

**Figure S2** Internal validation results of C-index distribution of prediction models with a 1000-bootstrapping method. Model 1: ESC risk factors (age, peak LVOT resting gradient, NSVT, family history of SCD, history of syncope, left atrium size, max LVT) + LGE%. Model 2: model 1 + LV max apical FD. Model 3: model 1 + RV global FD. Model 4: model 1 + LV max apical FD + RV global FD. ESC, European Society of Cardiology; FD, fractal dimension; LVOT, LV outflow tract; NSVT, non-sustained ventricular tachycardia; LV, left ventricle; RV, right ventricle; Max LVT, maximal LV wall thickness; LGE, late gadolinium enhancement.

**Table S1** Coefficients of variables in model 4

| Variables                   | Primary end point | Secondary end point |
|-----------------------------|-------------------|---------------------|
| Age                         | 0.07752           | 0.06118             |
| Peak LVOT resting gradients | 0.00764           | 0.02302             |
| NSVT                        | 0.01203           | 0.72482             |
| Family history of SCD       | 0.42003           | 0.06509             |
| History of syncope          | 1.43670           | 0.22554             |
| Left atrium size            | 0.03565           | 0.03569             |
| Max LVT                     | -0.01681          | -0.04867            |
| LGE (%)                     | 0.06606           | 0.08081             |
| LV max apical FD            | 0.11150           | 0.12779             |
| RV global FD                | 0.12999           | 0.14322             |

LVOT, LV outflow tract; NSVT, non-sustained ventricular tachycardia; SCD, sudden cardiac death; Max LVT, maximal LV wall thickness; LGE, late gadolinium enhancement; LV, left ventricular; FD, fractal dimension; RV, right ventricular.

**Table S2** Intra-observer and inter-observer variability in biventricular fractal analysis and LGE percentage measurement

| Variables        | Observer | ICC  | P value |
|------------------|----------|------|---------|
| LV global FD     | Intra    | 0.99 | <0.001  |
|                  | Inter    | 0.99 | <0.001  |
| LV max apical FD | Intra    | 0.98 | <0.001  |
|                  | Inter    | 0.97 | <0.001  |
| LV max basal FD  | Intra    | 0.96 | <0.001  |
|                  | Inter    | 0.96 | <0.001  |
| RV global FD     | Intra    | 0.99 | <0.001  |
|                  | Inter    | 0.98 | <0.001  |
| RV max apical FD | Intra    | 0.94 | <0.001  |
|                  | Inter    | 0.93 | <0.001  |
| RV max basal FD  | Intra    | 0.92 | <0.001  |
|                  | Inter    | 0.90 | <0.001  |
| LGE percentage   | Intra    | 0.95 | <0.001  |
|                  | Inter    | 0.94 | <0.001  |

LGE, late gadolinium enhancement; ICC, intraclass correlation coefficient; LV, left ventricular; FD, fractal dimension; RV, right ventricular.
